# Supplementary material for: Effect of Depth across a Latitudinal Gradient in the Structure of Rhodolith Seabeds and Associated Biota across the Eastern Atlantic Ocean
Source: MDPI journal article supplement (doi:10.3390/d15010103), 2023-01-12
Supplement: s1 [file s1]

## Supplementary Materials

**Table S1.** Morphological attributes (mean  $\pm$  SD) of rhodoliths at each depth strata across five regions, including the size, shape (% of spheroidal rhodoliths, as defined by Sneed and Folk, 1958), mean diameter (mm) and the epiflora (g/kg) found on rhodoliths.

|                    | Brittany         | Galicia           | Madeira          | Gran Canaria     | Principe Island  |
|--------------------|------------------|-------------------|------------------|------------------|------------------|
| Mean Diameter (mm) |                  |                   |                  |                  |                  |
| Shallow            | 14.20 $\pm$ 2.97 | -                 | 35.40 $\pm$ 3.78 | 16.90 $\pm$ 1.85 | 24.80 $\pm$ 3.39 |
| Intermediate       | 17.10 $\pm$ 2.60 | 14.10 $\pm$ 1.52  | 39.30 $\pm$ 2.00 | 30.10 $\pm$ 8.95 | 25.30 $\pm$ 5.38 |
| Deep               | 18.40 $\pm$ 5.72 | 12.10 $\pm$ 2.56  | 42.90 $\pm$ 1.85 | 22.00 $\pm$ 4.81 | 20.00 $\pm$ 4.24 |
| Sphericity (%)     |                  |                   |                  |                  |                  |
| Shallow            | 71.60 $\pm$ 4.12 | -                 | 83.78 $\pm$ 0.56 | 80.24 $\pm$ 2.07 | 76.69 $\pm$ 3.25 |
| Intermediate       | 65.67 $\pm$ 2.65 | 37.12 $\pm$ 23.40 | 87.93 $\pm$ 0.40 | 81.26 $\pm$ 1.69 | 71.63 $\pm$ 4.38 |
| Deep               | 63.45 $\pm$ 8.07 | 29.86 $\pm$ 1.88  | 88.41 $\pm$ 0.69 | 79.64 $\pm$ 0.49 | 71.77 $\pm$ 4.39 |
| Epiflora (g/kg)    |                  |                   |                  |                  |                  |
| Shallow            | 0.90 $\pm$ 1.02  | -                 | 0.00 $\pm$ 0.00  | 0.87 $\pm$ 1.07  | 1.09 $\pm$ 0.95  |
| Intermediate       | 1.79 $\pm$ 1.48  | 0.49 $\pm$ 0.24   | 0.01 $\pm$ 0.02  | 1.01 $\pm$ 1.48  | 0.16 $\pm$ 0.10  |
| Deep               | 1.96 $\pm$ 2.16  | 0.59 $\pm$ 0.37   | 1.40 $\pm$ 1.63  | 0.13 $\pm$ 0.14  | 0.80 $\pm$ 0.26  |

**Table S2.** Results of the GLM testing whether the mean diameter differed among depth strata across latitudes. Significant differences at  $P < 0.1$  \*  $< 0.05$ , \*\*  $< 0.01$ , \*\*\*  $< 0.0001$ .

|                                  | Estimate | Std. Error | Z Value | P         |     |
|----------------------------------|----------|------------|---------|-----------|-----|
| Intercept (Depth [Shallow])      | 2.87     | 0.05       | 55.49   | $< 2e-16$ | *** |
| Latitude                         | -0.01    | 0.00       | -4.47   | 7.75e-06  | *** |
| Depth [Intermediate]             | 0.11     | 0.05       | 2.05    | 0.0409    | *   |
| Depth [Deep]                     | 0.02     | 0.05       | 0.42    | 0.6744    |     |
| Intercept (Depth [Intermediate]) | 2.98     | 0.05       | 59.56   | $< 2e-16$ | *** |
| Latitude                         | -0.01    | 0.00       | -4.47   | 7.75e-06  | *** |
| Depth [Shallow]                  | -0.11    | 0.05       | -2.05   | 0.0409    | *   |
| Depth [Deep]                     | -0.09    | 0.05       | -1.73   | 0.0843    | .   |
| Intercept (Depth [Deep])         | 2.89     | 0.05       | 56.62   | $< 2e-16$ | *** |
| Latitude                         | -0.01    | 0.00       | -4.47   | 7.75e-06  | *** |
| Depth [Shallow]                  | -0.02    | 0.05       | -0.42   | 0.6744    |     |
| Depth [Intermediate]             | 0.09     | 0.05       | 1.73    | 0.0843    | .   |

**Table S3.** Results of the GLM testing whether sphericity differed among depth strata across latitudes. Significant differences at  $P < 0.1$  \*  $< 0.05$ , \*\* $< 0.01$ , \*\*\* $< 0.0001$ .

|                                  | Estimate | Std. Error | Z Value | <i>P</i> |
|----------------------------------|----------|------------|---------|----------|
| Intercept (Depth [Shallow])      | -0.13    | 0.24       | -0.54   | 0.588    |
| Latitude                         | -0.00    | 0.01       | -0.76   | 0.450    |
| Depth [Intermediate]             | -0.11    | 0.25       | -0.46   | 0.647    |
| Depth [Deep]                     | -0.14    | 0.25       | -0.58   | 0.563    |
| Intercept (Depth [Intermediate]) | -0.24    | 0.24       | -0.99   | 0.320    |
| Latitude                         | -0.00    | 0.01       | -0.76   | 0.450    |
| Depth [Shallow]                  | 0.11     | 0.25       | 0.46    | 0.647    |
| Depth [Deep]                     | -0.03    | 0.24       | -0.13   | 0.899    |
| Intercept (Depth [Deep])         | -0.27    | 0.24       | -1.11   | 0.266    |
| Latitude                         | -0.00    | 0.01       | -0.76   | 0.450    |
| Depth [Shallow]                  | 0.14     | 0.25       | 0.58    | 0.563    |
| Depth [Intermediate]             | 0.03     | 0.24       | 0.13    | 0.899    |

**Table S4.** Results of the GLM testing whether epiphytic algal biomass differed among depth strata across latitudes. Significant differences at  $P < 0.1$  \*  $< 0.05$ , \*\* $< 0.01$ , \*\*\* $< 0.0001$ .

|                                  | Estimate | Std. Error | Z Value | <i>P</i>  |
|----------------------------------|----------|------------|---------|-----------|
| Intercept (Depth [Shallow])      | -0.77    | 0.27       | -2.83   | 0.0047 ** |
| Latitude                         | 0.02     | 0.01       | 2.34    | 0.0193 *  |
| Depth [Intermediate]             | -0.08    | 0.25       | -0.31   | 0.7538    |
| Depth [Deep]                     | 0.27     | 0.24       | 1.13    | 0.2568    |
| Intercept (Depth [Intermediate]) | -0.85    | 0.28       | -3.10   | 0.0020 ** |
| Latitude                         | 0.02     | 0.01       | 2.34    | 0.0193 *  |
| Depth [Shallow]                  | 0.08     | 0.25       | 0.31    | 0.7538    |
| Depth [Deep]                     | 0.35     | 0.22       | 1.56    | 0.1185    |
| Intercept (Depth [Deep])         | -0.50    | 0.26       | -1.95   | 0.0517 .  |
| Latitude                         | 0.02     | 0.01       | 2.34    | 0.0193 *  |
| Depth [Shallow]                  | -0.27    | 0.24       | -1.13   | 0.2568    |
| Depth [Intermediate]             | -0.35    | 0.22       | -1.56   | 0.1185    |

**Table S5.** Faunal abundances (number of individuals, standardized by the sample weight of rhodoliths (mean  $\pm$  SD) at each depth strata across regions.

| Abundance<br>(Ind·kg <sup>-1</sup> ) | Brittany           | Galicia           | Madeira           | Gran Canaria     | Príncipe<br>Island |
|--------------------------------------|--------------------|-------------------|-------------------|------------------|--------------------|
| <b>Annelida</b>                      |                    |                   |                   |                  |                    |
| Shallow                              | 149.7 $\pm$ 144.9  | -                 | 6.3 $\pm$ 4.2     | 3.5 $\pm$ 2.3    | 3.8 $\pm$ 1.7      |
| Intermediate                         | 39.5 $\pm$ 22.0    | 2.9 $\pm$ 2.0     | 4.4 $\pm$ 3.3     | 1.4 $\pm$ 1.2    | 5.2 $\pm$ 4.2      |
| Deep                                 | 37.6 $\pm$ 29.7    | 13.3 $\pm$ 11.5   | 2.6 $\pm$ 2.1     | 2.8 $\pm$ 3.4    | 12.6 $\pm$ 9.5     |
| <b>Arthropoda</b>                    |                    |                   |                   |                  |                    |
| Shallow                              | 1425.2 $\pm$ 956.6 | -                 | 42.9 $\pm$ 18.0   | 86.6 $\pm$ 24.3  | 16.2 $\pm$ 9.8     |
| Intermediate                         | 531.3 $\pm$ 546.4  | 71.7 $\pm$ 40.9   | 43.2 $\pm$ 21.5   | 72.8 $\pm$ 46.7  | 12.1 $\pm$ 4.9     |
| Deep                                 | 727.7 $\pm$ 956.6  | 125.6 $\pm$ 120.0 | 16.6 $\pm$ 8.0    | 36.5 $\pm$ 12.8  | 10.5 $\pm$ 6.0     |
| <b>Echinodermata</b>                 |                    |                   |                   |                  |                    |
| Shallow                              | 69.7 $\pm$ 45.1    | -                 | 3.3 $\pm$ 9.2     | 0.9 $\pm$ 1.2    | 4.9 $\pm$ 3.7      |
| Intermediate                         | 26.6 $\pm$ 31.4    | 7.3 $\pm$ 4.5     | 4.5 $\pm$ 2.4     | 1.1 $\pm$ 1.4    | 6.7 $\pm$ 5.2      |
| Deep                                 | 34.3 $\pm$ 23.1    | 17.2 $\pm$ 8.9    | 1.4 $\pm$ 1.1     | 2.1 $\pm$ 2.0    | 10.1 $\pm$ 5.1     |
| <b>Mollusca</b>                      |                    |                   |                   |                  |                    |
| Shallow                              | 64.2 $\pm$ 83.4    | -                 | 313.4 $\pm$ 129.6 | 96.7 $\pm$ 130.3 | 3.9 $\pm$ 3.1      |
| Intermediate                         | 75.0 $\pm$ 67.1    | 103.2 $\pm$ 42.8  | 245.9 $\pm$ 69.4  | 153.4 $\pm$ 66.2 | 5.9 $\pm$ 5.1      |
| Deep                                 | 114.1 $\pm$ 88.8   | 39.8 $\pm$ 17.6   | 124.2 $\pm$ 83.4  | 14.6 $\pm$ 8.1   | 4.0 $\pm$ 3.3      |

**Table S6.** Results of the GLM testing whether epifaunal abundances (Arthropoda, Mollusca, Echinodermata and Annelida) differed among depth strata across latitudes. Significant differences at  $P < 0.1$  \*  $< 0.05$ , \*\*  $< 0.01$ , \*\*\*  $< 0.0001$ .

|                                  | Estimate | Std. Error | Z Value | P          |
|----------------------------------|----------|------------|---------|------------|
| <b>Arthropoda</b>                |          |            |         |            |
| Intercept (Depth [Shallow])      | -0.02    | 0.05       | -0.35   | 0.729      |
| Latitude                         | 0.15     | 0.00       | 147.73  | <2e-16 *** |
| Depth [Intermediate]             | -1.10    | 0.01       | -77.84  | <2e-16 *** |
| Depth [Deep]                     | -0.88    | 0.01       | -66.65  | <2e-16 *** |
| Intercept (Depth [Intermediate]) | -1.12    | 0.05       | -23.65  | <2e-16 *** |
| Latitude                         | 0.15     | 0.00       | 147.73  | <2e-16 *** |
| Depth [Shallow]                  | 1.10     | 0.01       | 77.84   | <2e-16 *** |
| Depth [Deep]                     | 0.23     | 0.02       | 14.43   | <2e-16 *** |
| Intercept (Depth [Deep])         | -0.89    | 0.05       | -18.99  | <2e-16 *** |
| Latitude                         | 0.15     | 0.00       | 147.73  | <2e-16 *** |

|                      |       |      |        |        |     |
|----------------------|-------|------|--------|--------|-----|
| Depth [Shallow]      | 0.88  | 0.01 | 66.65  | <2e-16 | *** |
| Depth [Intermediate] | -0.23 | 0.02 | -14.43 | <2e-16 | *** |

---

### Mollusca

|                                  |       |      |        |          |     |
|----------------------------------|-------|------|--------|----------|-----|
| Intercept (Depth [Shallow])      | 3.99  | 0.03 | 155.80 | < 2e-16  | *** |
| Latitude                         | 0.03  | 0.00 | 41.16  | < 2e-16  | *** |
| Depth [Intermediate]             | -0.10 | 0.02 | -4.87  | 1.13e-06 | *** |
| Depth [Deep]                     | -0.77 | 0.02 | -32.94 | < 2e-16  | *** |
| Intercept (Depth [Intermediate]) | 3.90  | 0.03 | 149.19 | < 2e-16  | *** |
| Latitude                         | 0.03  | 0.00 | 41.16  | < 2e-16  | *** |
| Depth [Shallow]                  | 0.10  | 0.02 | 4.87   | 1.13e-06 | *** |
| Depth [Deep]                     | -0.68 | 0.02 | -29.98 | < 2e-16  | *** |
| Intercept (Depth [Deep])         | 3.22  | 0.03 | 110.61 | <2e-16   | *** |
| Latitude                         | 0.03  | 0.00 | 41.16  | <2e-16   | *** |
| Depth [Shallow]                  | 0.77  | 0.02 | 32.94  | <2e-16   | *** |
| Depth [Intermediate]             | 0.68  | 0.02 | 29.98  | <2e-16   | *** |

---

### Echinodermata

|                                  |       |      |        |          |     |
|----------------------------------|-------|------|--------|----------|-----|
| Intercept (Depth [Shallow])      | 0.64  | 0.10 | 6.29   | 3.27e-10 | *** |
| Latitude                         | 0.07  | 0.00 | 28.37  | < 2e-16  | *** |
| Depth [Intermediate]             | -0.89 | 0.06 | -15.21 | < 2e-16  | *** |
| Depth [Deep]                     | -0.55 | 0.05 | -10.34 | < 2e-16  | *** |
| Intercept (Depth [Intermediate]) | -0.25 | 0.11 | -2.33  | 0.0196   | *   |
| Latitude                         | 0.07  | 0.00 | 28.37  | < 2e-16  | *** |
| Depth [Shallow]                  | 0.89  | 0.06 | 15.21  | < 2e-16  | *** |
| Depth [Deep]                     | 0.34  | 0.06 | 5.65   | 1.57e-08 | *** |
| Intercept (Depth [Deep])         | 0.09  | 0.10 | 0.88   | 0.379    |     |
| Latitude                         | 0.07  | 0.00 | 28.37  | < 2e-16  | *** |
| Depth [Shallow]                  | 0.55  | 0.05 | 10.34  | < 2e-16  | *** |
| Depth [Intermediate]             | -0.34 | 0.06 | -5.65  | 1.57e-8  | *** |

---

### Annelida

|                                  |       |      |        |          |     |
|----------------------------------|-------|------|--------|----------|-----|
| Intercept (Depth [Shallow])      | 0.42  | 0.10 | 4.39   | 1.15e-05 | *** |
| Latitude                         | 0.09  | 0.00 | 41.15  | < 2e-16  | *** |
| Depth [Intermediate]             | -1.31 | 0.05 | -28.16 | < 2e-16  | *** |
| Depth [Deep]                     | -1.20 | 0.04 | -26.82 | < 2e-16  | *** |
| Intercept (Depth [Intermediate]) | -0.89 | 0.10 | -8.76  | <2e-16   | *** |
| Latitude                         | 0.09  | 0.00 | 41.15  | <2e-16   | *** |
| Depth [Shallow]                  | 1.31  | 0.05 | 28.16  | <2e-16   | *** |
| Depth [Deep]                     | 0.11  | 0.05 | 2.03   | 0.0426   | *   |
| Intercept (Depth [Deep])         | -0.78 | 0.10 | -7.73  | 1.06e-14 | *** |

|                      |       |      |       |         |     |
|----------------------|-------|------|-------|---------|-----|
| Latitude             | 0.09  | 0.00 | 41.15 | < 2e-16 | *** |
| Depth [Shallow]      | 1.20  | 0.04 | 26.82 | < 2e-16 | *** |
| Depth [Intermediate] | -0.11 | 0.05 | -2.03 | 0.0426  | *   |

---
